# Supplementary material for: Co-speciation in bedbug Wolbachia parallel the pattern in nematode hosts
Source: PubMed Central journal article supplement (PMC5995804; doi:10.1038/s41598-018-25545-y), 2018-06-11
Supplement: 41598_2018_25545_MOESM1_ESM.pdf [file 41598_2018_25545_MOESM1_ESM.pdf]

**Supplementary information to the manuscript titled:**

**Co-speciation in bedbug *Wolbachia* parallel the pattern in nematode hosts**

**Authors:** Ondřej Balvín, Steffen Roth, Benoit Talbot, Klaus Reinhardt

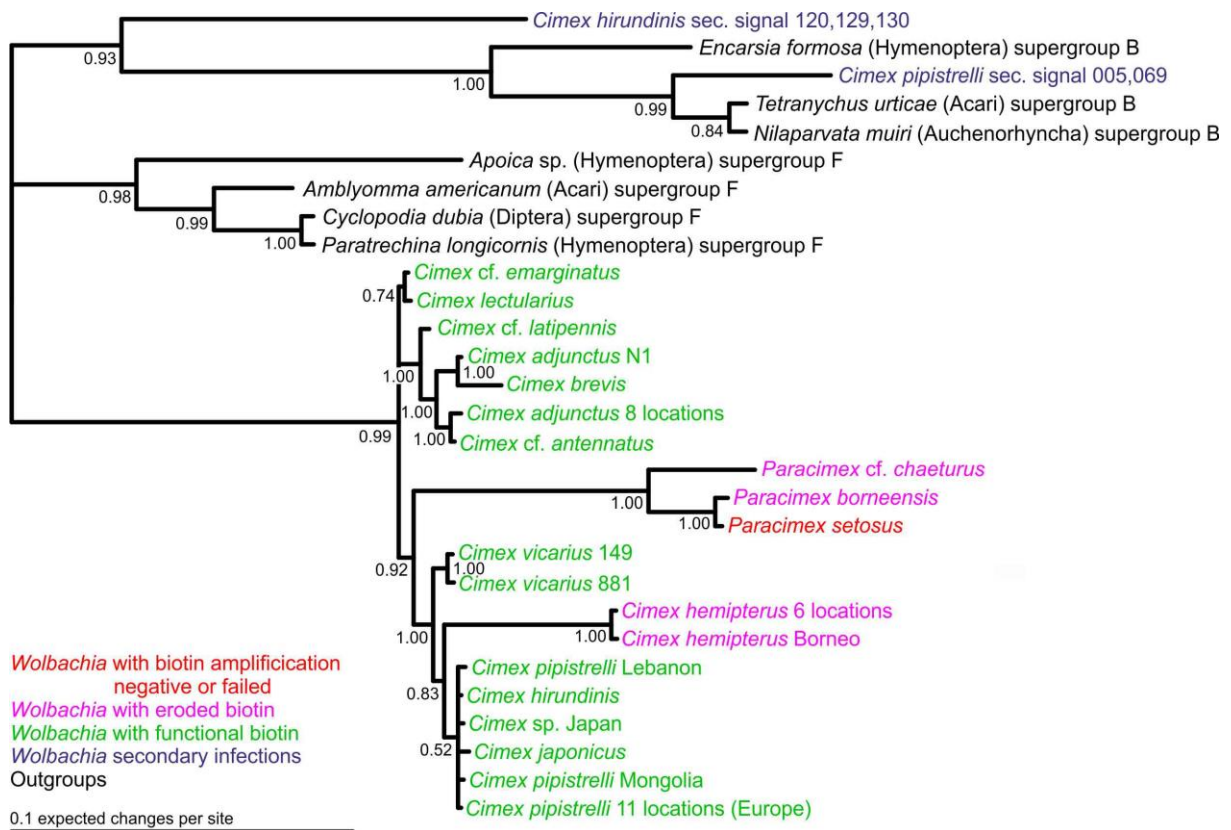

**Fig. S1.** *Wolbachia* phylogenetic tree based on concatenated HCPA and WSP datasets. Only unique combinations of sequences were used. Labels after bedbug species name refer to collection site (Table S1).

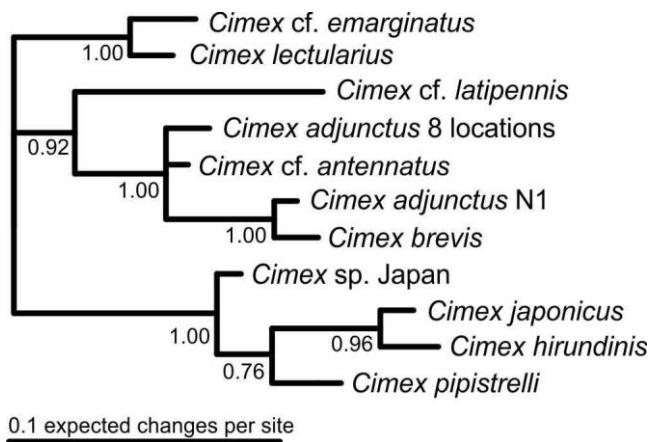

**Fig. S2.** A tree based on sequences of the BioC and BioH loci.

| Sample code                                                                        | Country         | Locality                                                          | Date        | Host                                                                                                                      | Collector                                  | Bedbug COI                                         | Bedbug 16S | Genbank accession numbers |                                     |               |                  |
|------------------------------------------------------------------------------------|-----------------|-------------------------------------------------------------------|-------------|---------------------------------------------------------------------------------------------------------------------------|--------------------------------------------|----------------------------------------------------|------------|---------------------------|-------------------------------------|---------------|------------------|
|                                                                                    |                 |                                                                   |             |                                                                                                                           |                                            |                                                    |            | Wolbachia hcpA            | Wolbachia hcpA, secondary infection | Wolbachia WSP | Wolbachia biotin |
| <b>Cimicinae: <i>Cimex adjunctus</i> Barber, 1939</b>                              |                 |                                                                   |             |                                                                                                                           |                                            |                                                    |            |                           |                                     |               |                  |
| 140                                                                                | USA             | Washington county, North Carolina                                 | 07.06.2005  | <i>Nycticeius humeralis</i>                                                                                               | Matina Kalcounis-Ruppell                   | GU985536                                           | GU985558   | MF662572                  |                                     | MF687874      | MF687889         |
| 141                                                                                | USA             | Galesburg, Kalamazoo county, Michigan                             | 06.07.2005  | <i>Eptesicus fuscus</i>                                                                                                   | Lee Johnson                                | GU985535                                           | GU985557   | MF662572                  |                                     | MF687874      | MF687889         |
| 142                                                                                | USA             | Fulton, Kalamazoo county, Michigan                                | 19.06.2005  | <i>Eptesicus fuscus</i>                                                                                                   | Lee Johnson                                | GU985537                                           | GU985559   | MF662572                  |                                     | MF687874      | MF687889         |
| N1                                                                                 | Canada          | Northwest Territories                                             | 16.06.2014  | <i>Myotis lucifugus</i>                                                                                                   | Laura Kaupas                               | KU534908                                           |            | MF662571                  |                                     | MF687873      | MF687890         |
| RH01                                                                               | USA             | Attica, Lapeer county, Michigan                                   | 27.07.2018  | <i>Eptesicus fuscus</i>                                                                                                   | Maarten Vonhof                             | KU534912                                           |            | MF662572                  |                                     | MF687874      | MF687889         |
| RG08                                                                               | USA             | Larimer county, Colorado                                          | 2005        | <i>Eptesicus fuscus</i>                                                                                                   | Roger Pearce, Maarten Vonhof               | KU534927                                           |            | MF662572                  |                                     | MF687874      | MF687889         |
| EFWN                                                                               |                 | Prairie Creek, Vigo county, Indiana                               | 13.07.2005  | <i>Eptesicus fuscus</i>                                                                                                   | Lee Johnson, John Whitaker, Maarten Vonhof | KU534927                                           |            | MF662572                  |                                     | MF687874      | MF687889         |
| MV642                                                                              | USA             | Bourbon county, Kentucky                                          | 17.08.2010  | <i>Eptesicus fuscus</i>                                                                                                   | Elizabeth Warburton, Maarten Vonhof        | KU534914                                           |            | MF662572                  |                                     | MF687874      | MF687889         |
| CCC                                                                                |                 | Canoe Creek State Park, Blair county, Pennsylvania                | 30.05.2006  | <i>Myotis lucifugus</i>                                                                                                   | Cal Butchkoski, Maarten Vonhof             | KU534908                                           |            | MF662572                  |                                     | MF687874      | MF687889         |
| <b>Cimicinae: <i>Cimex cf. antennatus</i> Usinger and Ueshima, 1965</b>            |                 |                                                                   |             |                                                                                                                           |                                            |                                                    |            |                           |                                     |               |                  |
| C10                                                                                | USA             | Antelope Valley, California                                       | 15.08.2002  | unknown bat host                                                                                                          | A.C. Lohmann                               | KF018760                                           | KF018732   | MF662573                  |                                     | MF687875      | MF687891         |
| <b>Cimicinae: <i>Cimex brevis</i> Usinger and Ueshima, 1965</b>                    |                 |                                                                   |             |                                                                                                                           |                                            |                                                    |            |                           |                                     |               |                  |
| N2                                                                                 | Canada          | Northwest Territories                                             | 20.06.2014  | <i>Myotis lucifugus</i>                                                                                                   | Laura Kaupas                               | MF680523                                           |            | MF662574                  |                                     | MF687876      | MF687892         |
| 5571                                                                               | Canada          | Londonderry, Colchester, Nova Scotia                              | 21.08.2009  | <i>Myotis septentrionalis</i>                                                                                             | Hugh Broders                               | MF680522                                           |            | MF662574                  |                                     | MF687876      | MF687892         |
| 11540                                                                              | Canada          | Cache River, Labrador                                             | 12.07.2012  | <i>Myotis lucifugus</i>                                                                                                   | Lynne Burns, Tony Parr, Hugh Broders       | MF680521                                           |            | MF662574                  |                                     | MF687876      | MF687892         |
| 7196                                                                               | Canada          | Wabush, Lac Joseph, Labrador                                      | 25.06.2011  | <i>Myotis lucifugus</i>                                                                                                   | Sara McCarthy, Hugh Broders                | MF680521                                           |            | MF662574                  |                                     | MF687876      | MF687892         |
| C20                                                                                | Canada          | Montana                                                           |             | <i>Eptesicus fuscus</i>                                                                                                   | C. Lausen                                  | KF018759                                           | KF018731   | MF662574                  |                                     | MF687876      | MF687892         |
| O9                                                                                 | Canada          | Bruce Peninsula National Park, Ontario                            | 08.10.2014  | <i>Lasionycteris noctivagans</i>                                                                                          | Kristin Jonasson                           | KY561679                                           |            | MF662574                  |                                     | MF687876      | MF687892         |
| 1721                                                                               | Canada          | Dollar Lake Provincial Park, Halifax, Nova Scotia                 | 20.06.2006  | <i>Myotis septentrionalis</i>                                                                                             | Hugh Broders                               | MF680523                                           |            | MF662574                  |                                     | MF687876      | MF687892         |
| 7513                                                                               | Canada          | Londonderry, Colchester, Nova Scotia                              | 19.08.2010  | <i>Myotis septentrionalis</i>                                                                                             | Hugh Broders                               | MF680522                                           |            | MF662574                  |                                     | MF687876      | MF687892         |
| 7909                                                                               | Canada          | Dutch Settlement, Halifax, Nova Scotia                            | 09.09.2010  | <i>Myotis septentrionalis</i>                                                                                             | Hugh Broders                               | MF680522                                           |            | MF662574                  |                                     | MF687876      | MF687892         |
| 11506                                                                              | Canada          | Minipi, Labrador                                                  | 09.07.2012  | <i>Myotis lucifugus</i>                                                                                                   | Lynne Burns, Tony Parr, Hugh Broders       | MF680521                                           |            | MF662574                  |                                     | MF687876      | MF687892         |
| <b>Cimicinae: <i>Cimex cf. emarginatus</i> Simov, Ivanova &amp; Schunger, 2006</b> |                 |                                                                   |             |                                                                                                                           |                                            |                                                    |            |                           |                                     |               |                  |
| 431                                                                                | Maroque         | Bouhachen, Rif                                                    | 06.05.2013  | <i>Pipistrellus pipistrellus</i>                                                                                          | Tomáš Bartonička                           | MF680526                                           | MF680517   | MF662576                  |                                     | MF687880      | MF687893         |
| <b>Cimicinae: <i>Cimex hemipterus</i> Fabricius, 1803</b>                          |                 |                                                                   |             |                                                                                                                           |                                            |                                                    |            |                           |                                     |               |                  |
| 092                                                                                | India           | Mannárákkát                                                       | 29.09.2005  | humans                                                                                                                    | Petr Šípek                                 | GU985538                                           | GU985560   | MF662585                  |                                     | MF687878      | MF687900         |
| 093                                                                                | Indonesia       | Kuala Lumpur                                                      | 2006        | humans                                                                                                                    | Magdalena Lučanová                         | KF018754                                           | GU985560   | MF662585                  |                                     | MF687878      | MF687900         |
| 148                                                                                | Indonesia       | Jakarta, Java, hotel                                              | 2008-2011   | humans                                                                                                                    | Petr Šípek                                 | KF018754                                           |            | MF662585                  |                                     | MF687878      | MF687900         |
| 348                                                                                | Malaysia        | Kotakinabalu, Borneo, hotel                                       | May 2011    | humans                                                                                                                    | Petr Šípek                                 | KF018754                                           |            | MF662585                  |                                     | MF687878      | MF687900         |
| 349                                                                                | South East Asia | unknown locality                                                  | 2011        | humans                                                                                                                    | Petr Šípek                                 | KF018754                                           |            | MF662585                  |                                     | MF687878      | MF687900         |
| 801                                                                                |                 | collection information missing                                    |             | humans                                                                                                                    | Robert Vlk                                 | KF018754                                           |            | MF662585                  |                                     | MF687878      | MF687900         |
| 347                                                                                | Malaysia        | Kota Kinabalu, Sabah, Borneo, hotel                               | summer 2015 | humans                                                                                                                    | Martina Komárková                          | KF018754                                           |            | MF662585                  |                                     | MF687879      | MF687900         |
| <b>Cimicinae: <i>Cimex (former Oeciacus) hirundinis</i> Lamarck, 1816</b>          |                 |                                                                   |             |                                                                                                                           |                                            |                                                    |            |                           |                                     |               |                  |
| 120                                                                                | Czech Republic  | Žitěč, Jindřichův Hradec district                                 | 23.11.2007  | <i>Delichon urbica</i>                                                                                                    | Jaroslav Cepák                             | GU985543                                           | GU985565   | MF662580                  | MF662578                            | MF687887      | MF687896         |
| 129                                                                                | Germany         | Postdam - Golm                                                    | 17.8.2007   | <i>Delichon urbica</i>                                                                                                    | Ingo Scheffler                             | GU985544                                           | GU985565   | MF662580                  | MF662578                            | MF687887      | MF687896         |
| 130                                                                                | Germany         | Postdam, Neu Fahrland                                             | 20.10.2007  | <i>Delichon urbica</i>                                                                                                    | Ingo Scheffler                             | GU985544                                           |            | MF662580                  | MF662578                            | MF687887      | MF687896         |
| 893                                                                                | Czech Republic  | Čížov, Znojmo district                                            | 26.5.2010   | <i>Delichon urbica</i>                                                                                                    | Antonín Reiter                             | GU985544                                           |            | MF662580                  |                                     | MF687887      | MF687896         |
| 890                                                                                | Czech Republic  | Karlovy Vary                                                      | summer 2015 | <i>Delichon urbica</i>                                                                                                    | Mrs. Vyklická                              | GU985544                                           |            | MF662580                  |                                     | MF687887      | MF687896         |
| <b>Cimicinae: <i>Cimex japonicus</i> Usinger, 1966</b>                             |                 |                                                                   |             |                                                                                                                           |                                            |                                                    |            |                           |                                     |               |                  |
| 350                                                                                | Japan           | Akita prefecture, Daisen city, Omagari bridge, bat roost          | 10.5.2010   | <i>Vespertilio superans</i>                                                                                               | Mitsuru Mukohyama                          | KC503541                                           | KF018727   | MF662582                  |                                     | MF687883      | MF687894         |
| 351                                                                                | Japan           | Aomori prefecture, Shichinohe town, Temmadate bathhouse           | 3.8.2010    | <i>Vespertilio superans</i>                                                                                               | Mitsuru Mukohyama & Tomoya Kobayashi       | KC503541                                           | KF018727   | MF662582                  |                                     | MF687883      | MF687894         |
| <b>Cimicinae: <i>Cimex cf. latipennis</i> Usinger and Ueshima 1965</b>             |                 |                                                                   |             |                                                                                                                           |                                            |                                                    |            |                           |                                     |               |                  |
| c18                                                                                | Canada          | British Columbia                                                  |             | unknown bat host                                                                                                          | T. Luszczell                               | KF018758                                           | KF018734   | MF662575                  |                                     | MF687877      | MF687895         |
| c19                                                                                | Canada          | British Columbia                                                  |             | <i>Myotis volans</i>                                                                                                      | T. Luszczell                               | KF018757                                           | KF018733   | MF662575                  |                                     | MF687877      | MF687895         |
| <b>Cimicinae: <i>Cimex lectularius</i> Linnaeus 1758</b>                           |                 |                                                                   |             |                                                                                                                           |                                            |                                                    |            |                           |                                     |               |                  |
| 089                                                                                | Iran            | Golestan province, picnic grass field                             | 27.05.2006  | unknown host, bats according to morphology                                                                                | Jiří Hájek, Pavel Chvojka                  | MF680527                                           | MF680518   | MF662577                  |                                     | MF687880      | AP013028         |
| 552                                                                                | Czech Republic  | Rokycany                                                          | 2014        | humans                                                                                                                    | Antonín Drozda                             | MF680529                                           |            | MF662577                  |                                     | MF687880      | AP013028         |
| PF2                                                                                | Czech Republic  | Doubravník, Brno - country district, papermill                    | 2014        | <i>Myotis emarginatus</i>                                                                                                 | Tomáš Bartonička                           | GU985526                                           |            | MF662577                  |                                     | MF687880      | AP013028         |
| HF3                                                                                | Czech Republic  | Hanušovice, Šumperk district, church                              | 2014        | <i>Myotis myotis</i>                                                                                                      | Tomáš Bartonička                           | MF680528                                           |            | MF662577                  |                                     | MF687880      | AP013028         |
| <b>Cimicinae: <i>Cimex pipistrelli</i> Jenyns, 1839, event. C.pip group</b>        |                 |                                                                   |             |                                                                                                                           |                                            |                                                    |            |                           |                                     |               |                  |
| 005                                                                                | Czech Republic  | Točnick, castle stairs                                            | 16.7.2005   | <i>Myotis myotis</i>                                                                                                      | Ondřej Balvín                              | GU985527                                           | GU985549   | MF662580                  | MF662581                            | MF687881      | MF687897         |
| 008                                                                                | Czech Republic  | Beroun, elementary school attic                                   | 16.5.2005   | <i>Columba livia</i>                                                                                                      | Ondřej Balvín                              | GU985527                                           | GU985549   | MF662580                  |                                     | MF687881      | MF687897         |
| 013                                                                                | Czech Republic  | Lužnice, Jindřichův Hradec district, Inst. of Botany of ASCR      | 28.5.2005   | <i>Myotis nattereri</i>                                                                                                   | Ondřej Balvín                              | KC503516                                           |            | MF662580                  |                                     | MF687881      | MF687897         |
| 021                                                                                | Czech Republic  | Ústěč, Litoměřice district, church attic                          | 6.6.2005    | <i>Myotis myotis</i>                                                                                                      | Borek Franěk                               | KC503519                                           |            | MF662580                  |                                     | MF687881      | MF687897         |
| 049                                                                                | Czech Republic  | Bohdalice-Pavlovice, Vyškov district, post office attic           | 27.6.2006   | <i>Myotis myotis</i>                                                                                                      | Martin Pokorný, Ondřej Balvín              | GU985529                                           |            | MF662580                  |                                     | MF687881      | MF687897         |
| 102                                                                                | Bulgaria        | Plovdiv, bridge                                                   | 3.11.2005   | <i>Nyctalus noctula</i>                                                                                                   | E. Tilova                                  | KC503516                                           |            | MF662580                  |                                     | MF687881      | MF687897         |
| 115                                                                                | Czech Republic  | Lišná, Písecký district, mist-netted bat                          | 6.8.2007    | <i>Nyctalus noctula</i>                                                                                                   | Radek Lučan                                | KC503523                                           |            | MF662580                  |                                     | MF687881      | MF687897         |
| 138                                                                                | Hungary         | Eger, mist-netted bat                                             | 1.4.2006    | <i>Nyctalus noctula</i>                                                                                                   | Péter Estók                                | KC503530                                           |            | MF662580                  |                                     | MF687881      | MF687897         |
| 139                                                                                | Hungary         | Bánhorvát, Borsod-Abaúj-Zemplén district, church attic            | 13.7.2008   | mixed bat colony ( <i>Rhinolophus ferrumequinum</i> , <i>Rh. euryale</i> , <i>Myotis myotis</i> , <i>M. emarginatus</i> ) | Péter Estók                                | KC503518                                           |            | MF662580                  |                                     | MF687881      | MF687897         |
| 153                                                                                | Hungary         | Baja, Bács-Kiskun district, Cserta-Duna áttöltés, mist-netted bat | 21.7.2007   | <i>Nyctalus noctula</i>                                                                                                   | Tamás Görföli                              | KC503512                                           |            | MF662580                  |                                     | MF687881      | MF687897         |
| 054                                                                                | Lebanon         | Nahr es Safa, mist-netted bat                                     | 26.4.2006   | <i>Nyctalus noctula lebanoticus</i>                                                                                       | Ivan Horáček                               | KC503517                                           |            | MF662580                  |                                     | MF687881      | MF687897         |
| 069                                                                                | Slovakia        | Nitra, park, mist-netted bat                                      | 21.8.2006   | <i>Nyctalus noctula</i>                                                                                                   | Martin Ševčík                              | GU985527                                           | GU985549   | MF662579                  | MF662581                            | MF687881      | MF687897         |
| onon                                                                               | Mongolia        | Onon Gol                                                          | 1.6.2008    | unknown bat host                                                                                                          | D. Dolch                                   | MF680530                                           |            | MF662580                  |                                     | MF687882      | MF687897         |
| <b>Cimicinae: <i>Cimex</i> sp.</b>                                                 |                 |                                                                   |             |                                                                                                                           |                                            |                                                    |            |                           |                                     |               |                  |
| 895                                                                                | Japan           | Kamionohara, Konda, Sasayama city, Hyogo pref., bird nest         | 9.3.2008    | <i>Delichon dasypus</i>                                                                                                   | Nobuhiko Kataoka                           | GU985542                                           | GU985564   | MF662582                  |                                     | MF687884      | MF687888         |
| 896                                                                                | Japan           | Kamiichi, Niimi city, Okhama pref., bird nest                     | 18.8.2008   | <i>Delichon dasypus</i>                                                                                                   | Nobuhiko Kataoka                           | GU985542                                           | GU985564   | MF662582                  |                                     | MF687884      | MF687888         |
| 897                                                                                | Japan           | Hokodate, Kotaki, Kisakata, Nikaho city, Akita pref., bird nest   | 31.8.2007   | <i>Delichon dasypus</i>                                                                                                   | Nobuhiko Kataoka                           | GU985542                                           | GU985564   | MF662582                  |                                     | MF687884      | MF687888         |
| 899                                                                                | Japan           | Kamionohara, Konda, Sasayama city, Hyogo pref., bird nest         | 3.7.2007    | <i>Delichon dasypus</i>                                                                                                   | Nobuhiko Kataoka                           | GU985542                                           | GU985564   | MF662582                  |                                     | MF687884      | MF687888         |
| <b>Cimicinae: <i>Cimex (former Oeciacus) vicarius</i> (Horvath 1890)</b>           |                 |                                                                   |             |                                                                                                                           |                                            |                                                    |            |                           |                                     |               |                  |
| 149                                                                                | USA             | Sarben, Keith County, Nebraska                                    | 2.10.2008   | <i>Petrochelidon pyrrhonota</i>                                                                                           | Charles Brown                              | GU985541                                           | GU985563   | MF662584                  |                                     | MF687885      |                  |
| 881                                                                                | USA             | Keystone, Keith County, Nebraska                                  | 1.10.2008   | <i>Petrochelidon pyrrhonota</i>                                                                                           | Charles Brown                              | specimen 881n3:<br>KF018752;<br>881n1:<br>KF018753 | KF018722   | MF662584                  |                                     | MF687886      |                  |
| <b>Cimicinae: <i>Paracimex borneensis</i> Usinger 1959</b>                         |                 |                                                                   |             |                                                                                                                           |                                            |                                                    |            |                           |                                     |               |                  |
| C94                                                                                | Malaysia        | Borneo, Niah cave                                                 | 26.06.2015  | <i>Aerodramus salanganus</i>                                                                                              | Steffen Roth & A. Scheidt                  | KF018761                                           | MF680519   |                           |                                     | MF687870      | MF687898         |
| <b>Cimicinae: <i>Paracimex setosus</i> Ferris and Usinger 1957</b>                 |                 |                                                                   |             |                                                                                                                           |                                            |                                                    |            |                           |                                     |               |                  |
| C9                                                                                 |                 | collection information missing                                    |             |                                                                                                                           |                                            | KF018761                                           | KF018735   |                           |                                     | MF687871      |                  |
| <b>Cimicinae: <i>Paracimex cf. chaeturus</i> Ueshima 1968</b>                      |                 |                                                                   |             |                                                                                                                           |                                            |                                                    |            |                           |                                     |               |                  |
| Jian                                                                               | China           | Yunnan, Jiangshui, cave                                           | May 2015    | <i>Aerodramus brevirostris</i>                                                                                            | Ondřej Balvín                              | MF680531                                           | MF680520   | MF662570                  |                                     | MF687872      | MF687899         |

Table S1. List of material used.

Reference for host assignment of sample 089 (*Cimex lectularius*): Balvín O, Munclinger P, Kratochvíl L, Vilfimo J. 2012 Mitochondrial DNA and morphology show independent evolutionary histories of bedbug *Cimex lectularius* (Heteroptera: Cimicidae) on bats and humans. Parasitol Res. 111(1):457–69.

| Name                                                 | Sequence 5' - 3'           | Annealing temperature | Reference      |
|------------------------------------------------------|----------------------------|-----------------------|----------------|
| <b><i>Wolbachia surface protein</i></b>              |                            |                       |                |
| wsp F1                                               | GTCCAATARSTGATGARGAAAC     | 58°C                  | 1              |
| wsp R1                                               | CYGCACCAAYAGYRCTRATAA      | 58°C                  | 1              |
| <b><i>Wolbachia HCPA gene</i></b>                    |                            |                       |                |
| Hcpa F1                                              | GAAATARCAGTTGCTGCAAA       | 55°C                  | 1              |
| Hcpa R1                                              | GAAAGTYRAGCAAGYTCTG        | 55°C                  | 1              |
| Hcpa R2                                              | GTTCAATTCCTGTGGCGAAAA      | 55°C                  | Newly designed |
| <b><i>Wolbachia biotin loci</i></b>                  |                            |                       |                |
| BioH F3348                                           | TGTAGCCTGTACCTGTACCCA      | 56°C                  | Newly designed |
| BioH R4123                                           | GTGTTTTGTCACGGTTGGGG       | 56°C                  | Newly designed |
| BioC F2742                                           | CCAACGTCGGTATCTGTTCT       | 56°C                  | Newly designed |
| BioC R3700                                           | CAGCTACCACACATACCACT       | 56°C                  | Newly designed |
| <b><i>Cimicidae cytochrome oxidase subunit I</i></b> |                            |                       |                |
| LepF                                                 | ATTCAACCAATCATAAAGATATNGG  | 42°C                  | 2, modified    |
| LepR                                                 | TAWACTTCWGGRTGTCCRAARAATCA | 42°C                  | 2, modified    |
| <b><i>Cimicidae 16S ribosomal gene</i></b>           |                            |                       |                |
| 16S LR-J                                             | TTACGCTGTTATCCCTAA         | 48°C                  | 3              |
| 16S LR-N                                             | CGCCTGTTTATCAAAAACAT       | 48°C                  | 4              |
| <b><i>Cimicidae 18S ribosomal gene</i></b>           |                            |                       |                |
| 18S-1                                                | CTGGTTGATCCTGCCAGTAGT      | 48°C                  | 5              |
| 18S-3                                                | GGTTAGAACTAGGGCGGTATCT     | 48°C                  | 5              |

**Table S2. An overview of primers used and designed in the present study.**

**References:**

- Baldo L et al. 2006 Multilocus Sequence Typing System for the Endosymbiont *Wolbachia pipientis*. Appl. Environ. Microbiol. 72, 7098–7110. (doi:10.1128/AEM.00731-06)
- Hajibabaei M, Janzen DH, Burns JM, Hallwachs W, Hebert PDN. 2006 DNA barcodes distinguish species of tropical Lepidoptera. PNAS 103, 968–971.
- Kambhampati S, Smith PT. 1995 PCR primers for the amplification of four insect mitochondrial gene fragments. Insect Mol. Biol. 4, 223–236.
- Simon C, Frati F, Beckenbach A, Crespi B, Liu H, Flook P. 1994 Evolution, weighting and phylogenetic utility of mitochondrial gene sequences and a compilation of conserved polymerase chain reaction primers. Ann. Entomol. Soc. Am. 87, 651–701.
- Tian Y, Zhu W, Li M, Xie Q, Bu W. 2008 Influence of data conflict and molecular phylogeny of major clades in Cimicomorphan true bugs (Insecta: Hemiptera: Heteroptera). Mol. Phylogenet. Evol. 47, 581–597.
